# Supplementary material
Source: PubMed Central journal article supplement (PMC2713568)

### **Supplemental Figure legends:**

**Figure S1. Expression of Notch receptors and ligands in HCC cells.** The total RNA of HepG2, SMMC7721 HCC cells, and a transformed normal liver cell line, Chung liver cells (Proc Soc Exp Biol Med 1954, 87:440) was extracted using Trizol reagent (Invitrogen). 2 $\mu$ g total RNA was used in a 20 $\mu$ l reverse-transcription reaction using the First Strand cDNA Synthesis kit (Toyobo) and PCR analysis was then performed with primers specific for Notch1, Notch2, Notch3, Notch4, Delta 1, Delta 3, Delta 4, Jagged 1 and Jagged 2 under the following condition: 94°C 1 minutes, 94°C 30 seconds, 60° C 45 seconds, 72°C 30 seconds for 30 cycles, 72° for 5 minutes. The sequences of primers are available under request.

**Figure S2. Efficiency of transient transfection with ICN.** (A) HepG2 and (B) SMMC7721 cells were transfected with Flag-tagged expression vector of constitutively active form of Notch1 (ICN) for 48 h, and ICN expression were analyzed by FACS using anti-Flag labeling. The histogram plots show the intensity of staining with anti-Flag antibody designated on the x-axis (black fills) with isotype control antibody (dashed lines) on the same plots.

**Figure S3. Quantification of the Western blot results of Fig. 1A.** The Western blot results of Fig.1A were subjected to quantitative analysis using by intensity scanning (UVP OptiChem 600) and statistical analysis (*t*-test). \*\*,  $p < 0.01$  vs. mock or control.

**Figure S4. Efficiency of stable transfection with ICN.** (A) HepG2 and (B) SMMC7721 cells stably expressing ICN were analyzed by FACS using anti-Flag labeling. Western blot analysis with the indicated antibody was also performed. The histogram plots show the intensity of staining with Flag antibody designated on the x-axis (black fills) with isotype control antibody (dashed lines) on the same plots.

Figure S1

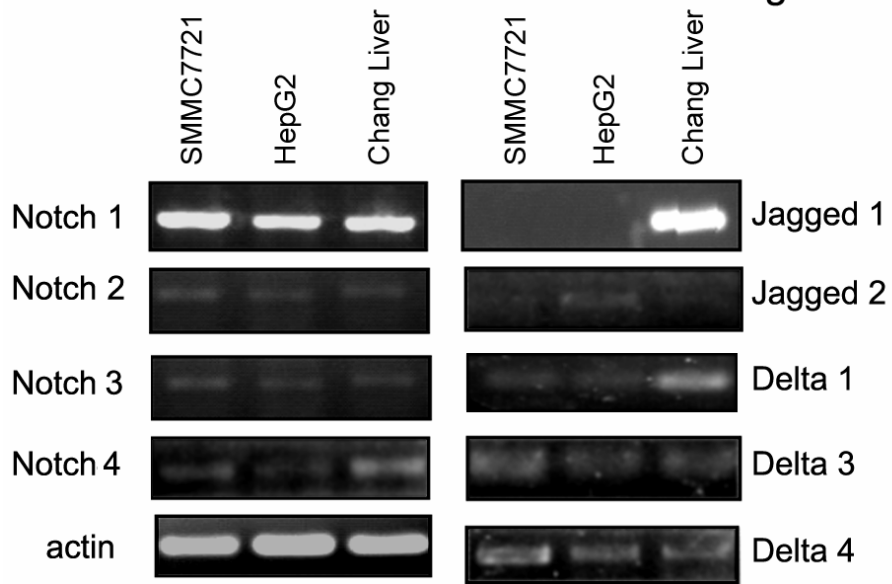

Figure S2

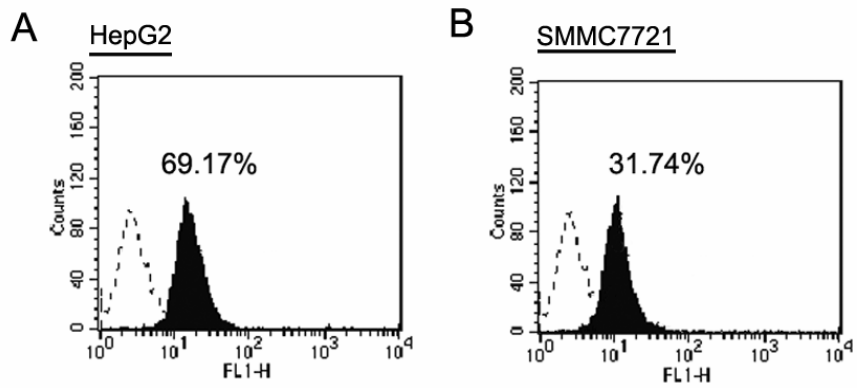

Figure S3

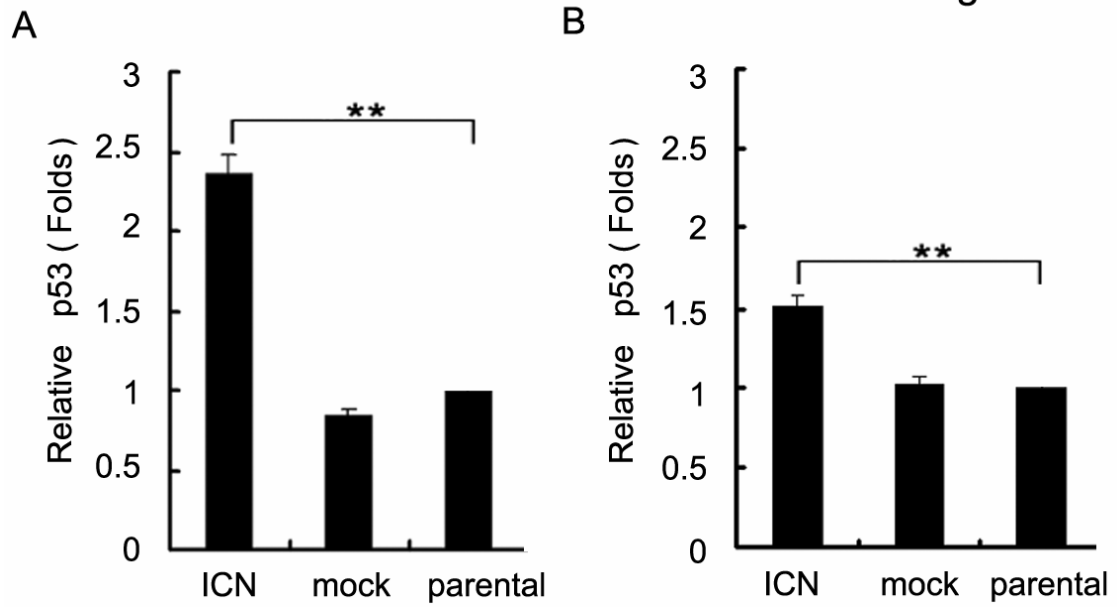

**A**

HepG2

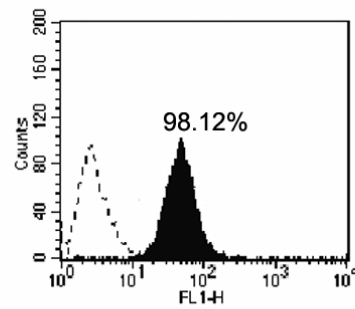

Figure S4

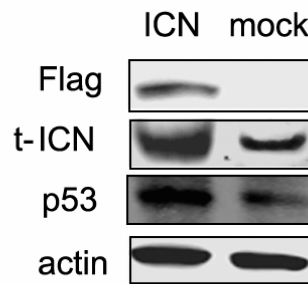

**B**

SMMC7721

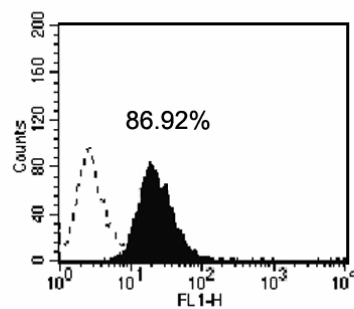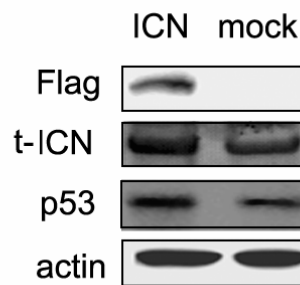

Supplement: supp_M109.002105_jbc.M109.002105-1.pdf [file supp_M109.002105_jbc.M109.002105-1.pdf]
